# Supplementary material for: Foxtail millet (Setaria italica (L.) P. Beauv) CIPKs are responsive to ABA and abiotic stresses
Source: PLoS One. 2019 Nov 12;14(11):e0225091. doi: 10.1371/journal.pone.0225091 (PMC6850536; doi:10.1371/journal.pone.0225091)
Supplement: S1 Table — (XLSX) [file pone.0225091.s003.xlsx]

## Sheet: Table S1
S1 Table Primers of SiCIPK genes for RT-qPCR
Gene name	Gene ID (phytozome)	Sense primers (5'-3')	Anti-sense primers (5'-3')
β-Actin	Seita.7G294000	CAGTGGACGCACAACAGGTAT	AGCAAGGTCAAGACGGAGAAT
SiCIPK1	Seita.1G065400	GGGCAGTTGCTATCCACATC	ATCACGCCACAAGACCAGAC
SiCIPK2	Seita.1G079400	TTGGAGTATGCTAAAGGTGGTG	CATCTAGGAGTAGGTTTTCTGGC
SiCIPK3	Seita.2G032200	AGCCTCCCAGATTTGAGACAG	AAGCATTCATCACTGACGGC
SiCIPK4	Seita.2G206200	GCTACGCCAAGATGTACCAGAA	CGAAGCCTTTCCTGAACCAC
SiCIPK5	Seita.2G405500	GATGTCCTCCTGCCTTGATTTA	GCTTGCCATTGCTCTTATGTACT
SiCIPK6	Seita.2G431900	CTTGCGATGTTGAGACGAGC	TGCCCGTTGACATCCATTT
SiCIPK7	Seita.2G432000	TTACAAACAAAGGATGCCCC	GATTCTTCAAACATACCCGACA
SiCIPK8	Seita.2G439100	TCGGATTACGGTTCCTCAAG	GCAGCGTCAACATCATCTAAAC
SiCIPK9	Seita.3G053800	TGAGCCCAACCCAATGAA	GAATCTTCATCATCGCTGTCG
SiCIPK10	Seita.3G181100	TCCAGCCACATTGTCATCAG	AAACCTCACTTCGTTGCCTC
SiCIPK11	Seita.3G205700	CTAATGAAACCCTCAAGGTCTGT	CACAAGCACAAACAGAATCACAC
SiCIPK13	Seita.3G285000	TAATGGAGCAGATCAAACGAGA	CAGAAATCAACCGCACTAACC
SiCIPK15	Seita.4G175800	GAGCAAATGCGGTTCGTGT	CGATGCTCACCTGGTACTCCT
SiCIPK16	Seita.4G221700	TGGTCCTCTTATGATGAATGCC	ATCCTGTTTGGTGATGTGCCT
SiCIPK17	Seita.5G031200	ATCACGGGTATCAAACAGCAT	TTGGGAGAACTAAACCAGGAAG
SiCIPK18	Seita.5G145700	AGGCAAGGTAGGAAGCAATG	GTACACCTTGGCGAAGTTGC
SiCIPK19	Seita.5G145900	GTTGGCACAGTCACAGGGTT	CCTTTGGAGTGCGAGATGAT
SiCIPK20	Seita.5G190200	ATAATGGAGCACTTGCCGATAC	AAACCAGGGTGGGAATGAATA
SiCIPK21	Seita.5G325400	TAATCGCCAAGCACCTCCTA	CTTGGTTCTTCTCCATGGCC
SiCIPK22	Seita.5G325500	TTGACACCAATCCGAACACTC	ACAGGCCATCCTCATCATCTAT
SiCIPK23	Seita.5G364100	TGTGCTTGTGGCGGGTTA	GCATTTTCGGTTGTTTCAGTCT
SiCIPK24	Seita.6G163200	ATACTTCAGGCAGCTCGTCT	CGAAGTCGACAACCTTGAGG
SiCIPK25	Seita.7G300300	GGGTTTGATCTATCTGGCCTCT	ATTCCTTCCCTCCTTCCTCC
SiCIPK26	Seita.7G311200	TTTGGGCTCAGTGCGCTAT	CACATGACCACAAATCAGCCA
SiCIPK27	Seita.8G003400	AAAAGTTGAAAGCAGGGAGGA	TTGCTTTTCGGACTTCTACCAT
SiCIPK28	Seita.8G014400	GAGGTTGGTGGCACATAAGAA	TGCACTAATAAGCTGCTGGAAG
SiCIPK29	Seita.8G171900	GGCAAGGAGGTACTTCCAACA	GCCCAGCCCAAACTCAGATA
SiCIPK30	Seita.8G172100	TATGACCTCACCACATTGGATG	CCCCTGCTCTGAGTCAAGTAAG
SiCIPK31	Seita.9G162500	GGAGATGTTGGAGGTGTCGG	TCTTCGCAGACGTGCCAC
SiCIPK32	Seita.9G411700	GAGATTTCGGTGATGAAGTTGG	CTCCTCCCTTGACGTATTCTAAC
SiCIPK33	Seita.9G422900	GATGGAGGCTATGATGGTGC	CCAAGAGGGGCAGGTAAACT
SiCIPK34	Seita.9G557900	TGATGGGAATGGCAAAGC	TGTGAAGTGATGGAGCAACCT
SiCIPK35	Seita.J025400	AGGCTATGATGGTGGAACGG	CCTCGTAAGATTAGAGTCCTCAAAA
